# Supplementary material for: Venom Proteomics of Trimeresurus gracilis, a Taiwan-Endemic Pitviper, and Comparison of Its Venom Proteome and VEGF and CRISP Sequences with Those of the Most Related Species
Source: MDPI journal article supplement (doi:10.3390/toxins15070408), 2023-06-22
Supplement: s1 [file s1]

Table S3. Potential bradykinin-potentiating peptides and natriuretic peptides in *Trimeresurus gracilis* venom identified by searching for non-trypsin-digested sequences detected by mass spectrometry.

| HPLC fraction | Database accession | Peptide name                                                            | Species                        | Sequence       | Protein score | Relative abundance (%) |
|---------------|--------------------|-------------------------------------------------------------------------|--------------------------------|----------------|---------------|------------------------|
| Fraction 4    | gi 547223175       | Bradykinin-potentiating peptide/<br>C-type natriuretic peptide, partial | <i>Ovophis<br/>okinavensis</i> | VPPDHHAGVGGGGA | 42.77         | 1.49                   |
| Fraction 5    | gi 547223175       | Bradykinin-potentiating peptide/<br>C-type natriuretic peptide, partial | <i>Ovophis<br/>okinavensis</i> | VPPDHHAGVGGGGA | 56.39         | 0.96                   |
| Fraction 6    | gi 1127252755      | BATXBPP10                                                               | <i>Bothrops<br/>atrox</i>      | PHESPAGGTAL    | 31.07         | 1.08                   |
